# Supplementary material for: AC-assisted deposition of aggregate free silica films with vertical pore structure
Source: Royal Society of Chemistry journal article supplement (doi:10.1039/d1nr08253a), 2022-01-01
Supplement: d1nr08253a1.pdf [file d1nr08253a1.pdf]

# Supplementary information: AC-assisted deposition of aggregate free silica films with vertical pore structure

Gilles E. Moehl,<sup>1\*</sup> Tauqir Nasir,<sup>1</sup> Yisong Han,<sup>2</sup> Yasir J. Noori,<sup>3</sup> Ruomeng Huang,<sup>3</sup> Richard Beanland,<sup>2</sup> Philip N. Bartlett<sup>1</sup> and Andrew L. Hector<sup>1\*</sup>

<sup>1</sup> School of Chemistry, University of Southampton, SO17 1BJ, United Kingdom. Email [A.L.Hector@soton.ac.uk](mailto:A.L.Hector@soton.ac.uk); [G.E.H.K.Moehl@soton.ac.uk](mailto:G.E.H.K.Moehl@soton.ac.uk)

<sup>2</sup> Department of Physics, University of Warwick, CV4 7AL, United Kingdom

<sup>3</sup> School of Electronics and Computer Science, University of Southampton, SO17 1BJ, United Kingdom

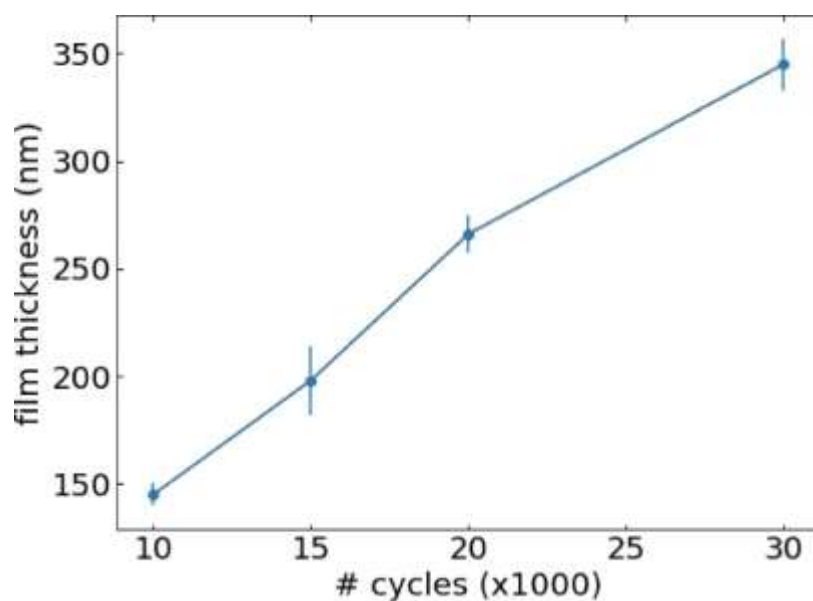

Figure S1: Film thickness versus number of periods extracted from the images shown in Figure 1 using the software ImageJ.<sup>1</sup>

Table S1: Diameters of spherical particles from films deposited at increasing number of periods starting from 10,000.

| #periods | Particle diameter (nm) | Standard variance (nm) |
|----------|------------------------|------------------------|
| 10,000   | 385                    | 7                      |
| 20,000   | 586                    | 43                     |
| 30,000   | 617                    | 120                    |
| 40,000   | 828                    | 163                    |

Table S2: Lateral peak positions of features shown in Figure 3 a-c) as well as their ratios showing the hexagonal ordering (1:√3:2).

| #periods | $q_0 \pm 0.15$<br>( $\text{nm}^{-1}$ ) | $q_1 \pm 0.15$<br>( $\text{nm}^{-1}$ ) | $q_2 \pm 0.15$<br>( $\text{nm}^{-1}$ ) | $q_1/q_0$ |
|----------|----------------------------------------|----------------------------------------|----------------------------------------|-----------|
| 10000    | 1.70                                   | 2.95                                   | 3.42                                   | 1.74      |
| 20000    | 1.69                                   | 2.93                                   | 3.37                                   | 1.73      |
| 30000    | 1.68                                   | 2.92                                   | 3.37                                   | 1.74      |

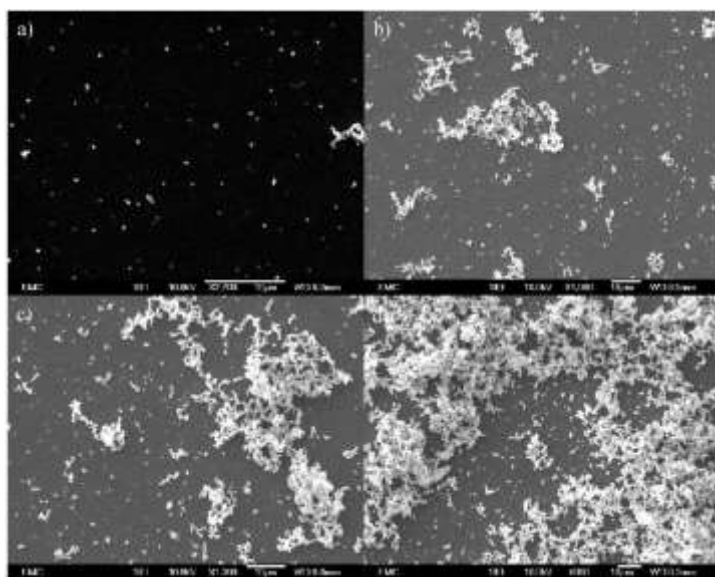

Figure S2: SEM images of control samples made by applying a sinusoidal potential to a TiN electrode immersed in a regular silica sol.  $f=100$  Hz, potential, -1 V to -2 V, a) 10k, b) 15k, c) 20k, d) 30k cycles.

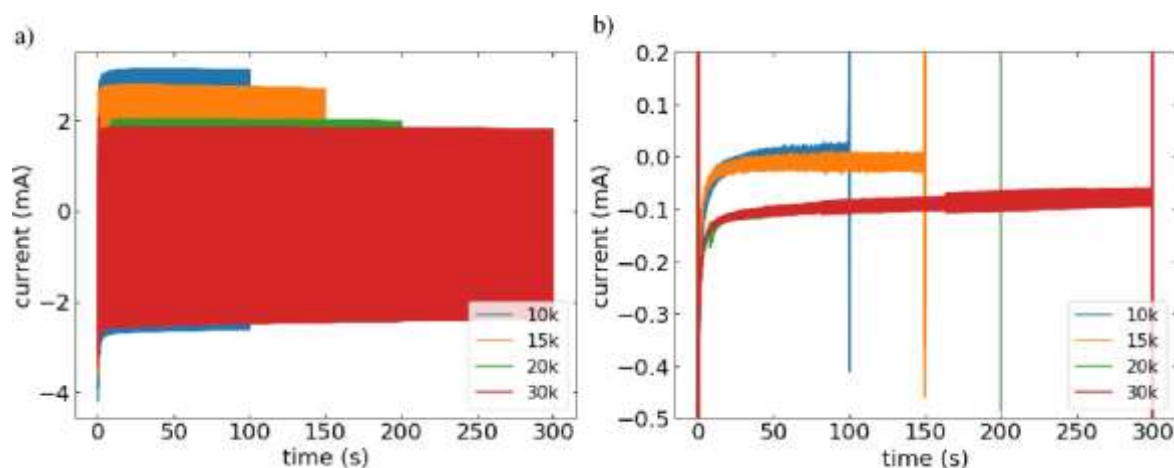

Figure S3: Filtered current response during silica deposition a regular silica sol using a sinusoidal signal of  $f=100$  Hz, potential, -1 V to -2 V, (a) 10k, 15k, 20k and 30k periods. (b) A custom Python script was used to employ a bandstop filter at 100 Hz,  $Q=30$  to the raw data.

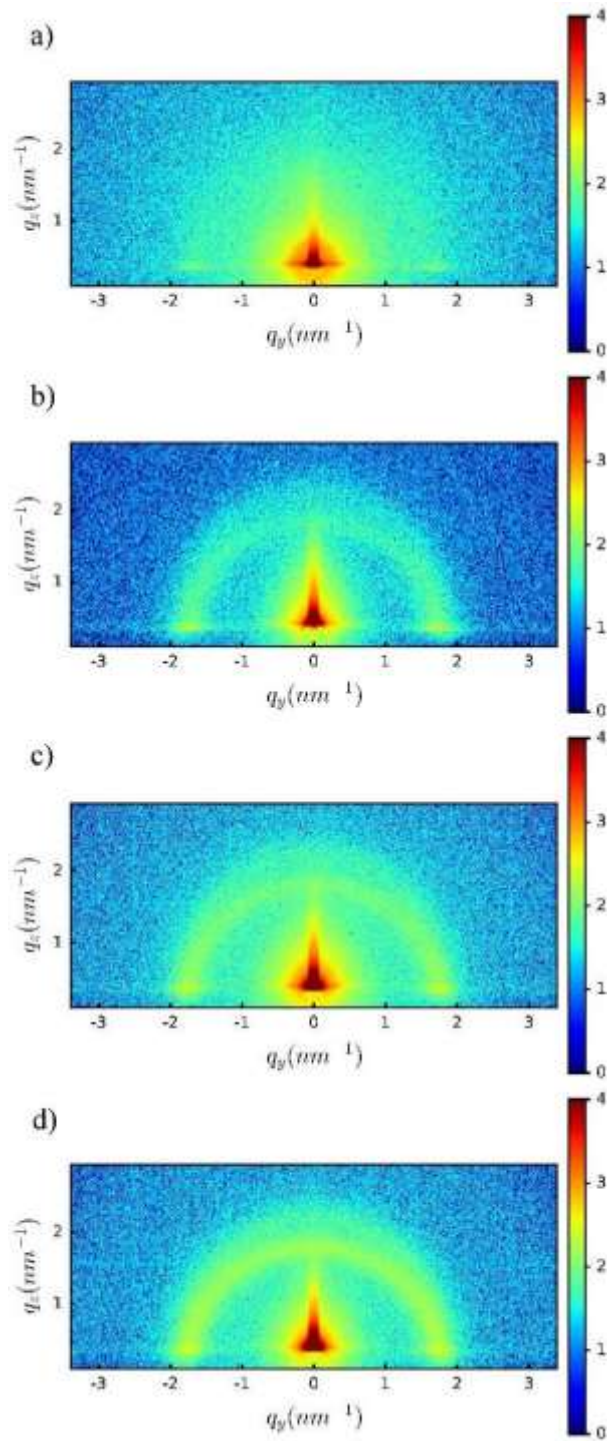

Figure S4: 2D GISAXS scattering images of the control samples taken on our Rigaku Smartlab at an angle of  $0.3^\circ$  for a duration of 30 min for the samples deposited with a) 10k, b) 15k, c) 20k, and d) 30k periods.

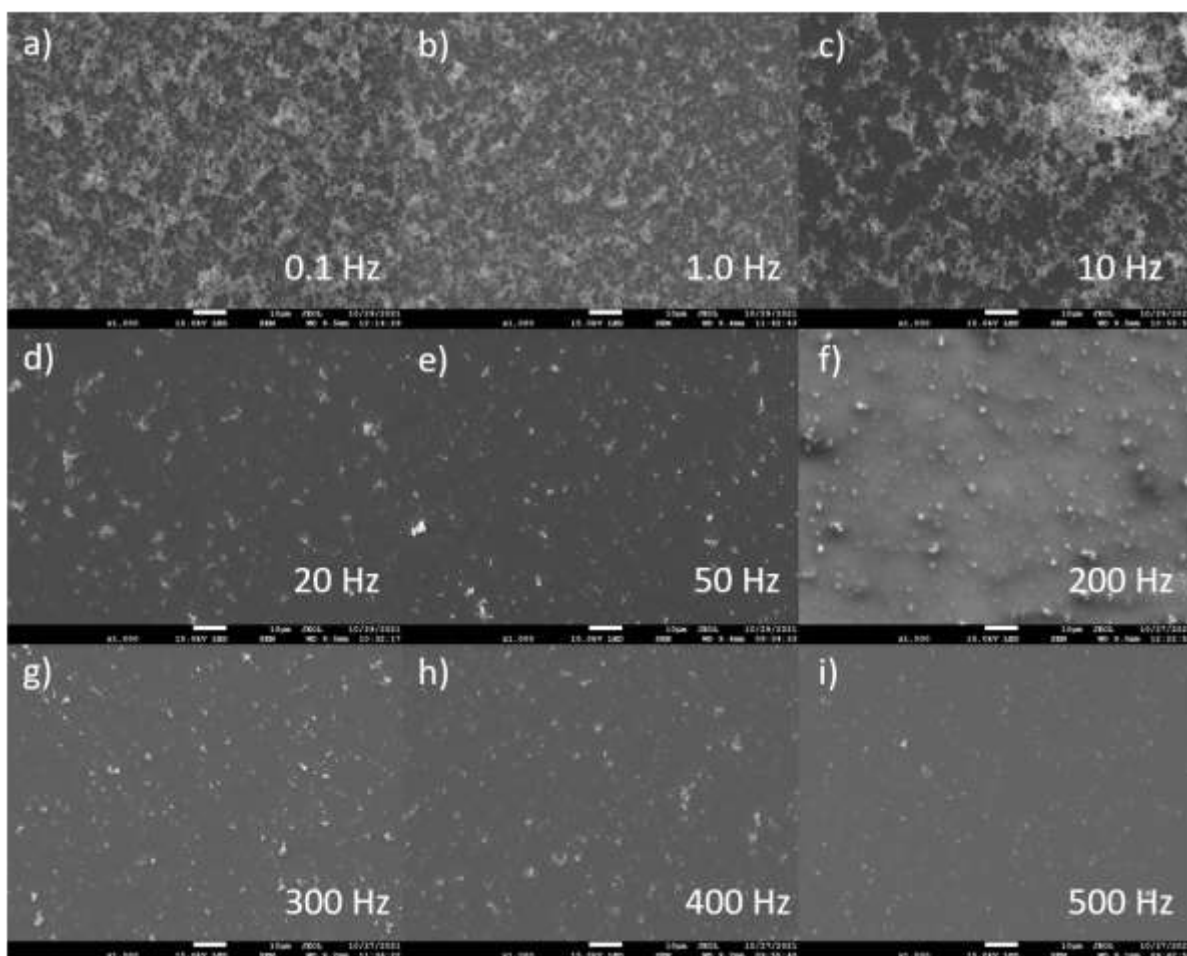

Figure S5: SEM images taken of samples deposited using a sinusoidal potential at frequencies of a) 0.1, b) 1, c) 10, d) 20, e) 50, f) 200, g) 300, h) 400 and i) 500 Hz in a nitrate free silica sol.

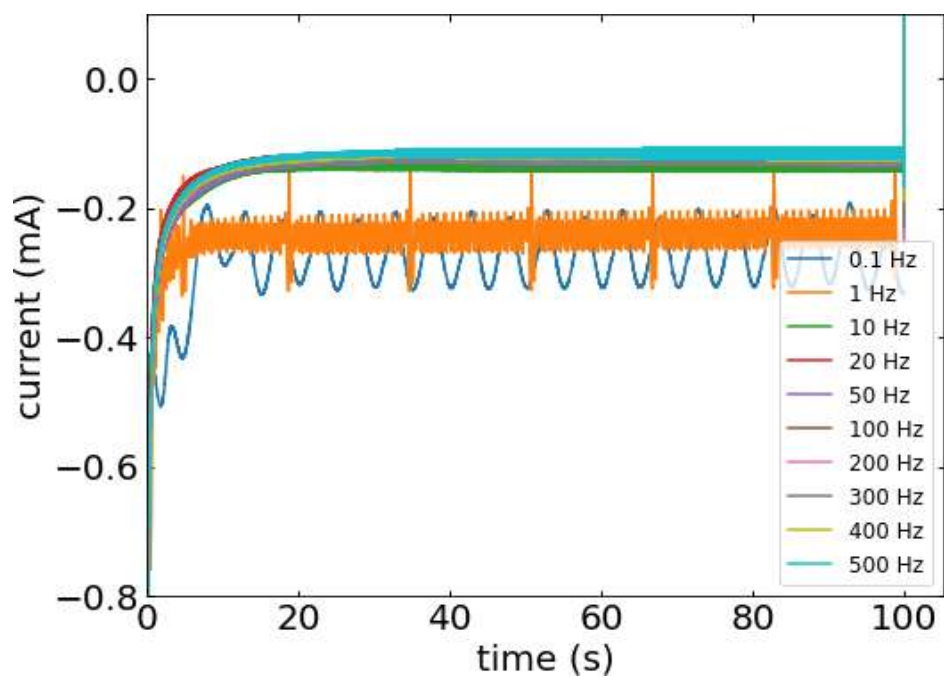

Figure S6: Filtered chronoamperometry data for samples deposited at various frequencies for 100 s each.

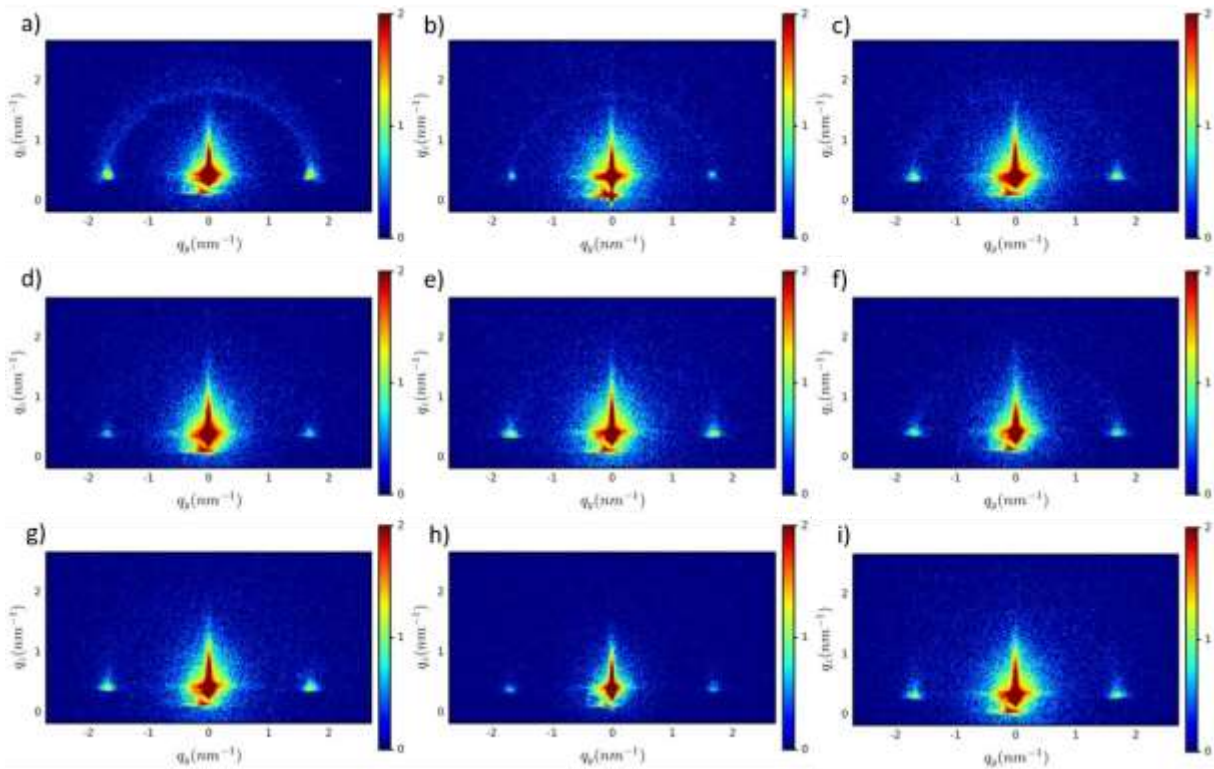

Figure S7: Two-dimensional GISAXS data of samples deposited using a sinusoidal potential at frequencies of a) 0.1, b) 1, c) 10, d) 20, e) 50, f) 200, g) 300, h) 400 and i) 500 Hz in a nitride free silica sol. Incident angle  $0.3^\circ$ , exposure time 15 min.

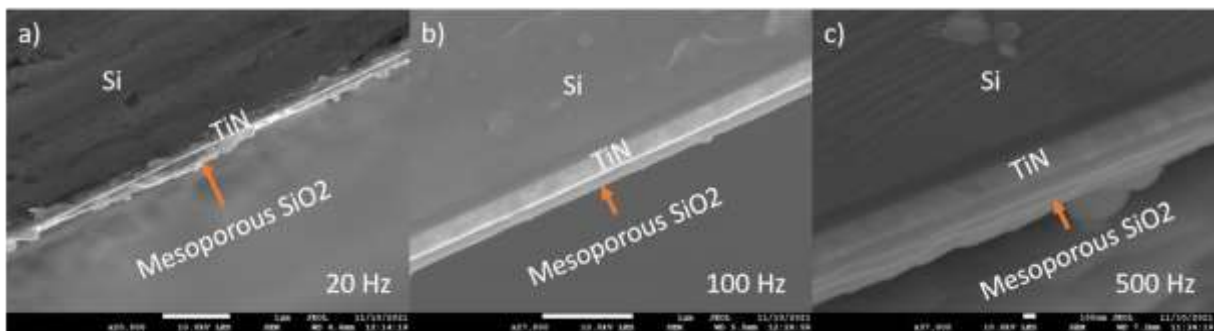

Figure S8: SEM cross-sections from silica samples deposited at a) 20, b) 100 and c) 500 Hz of sinusoidal potential for 100 s each.



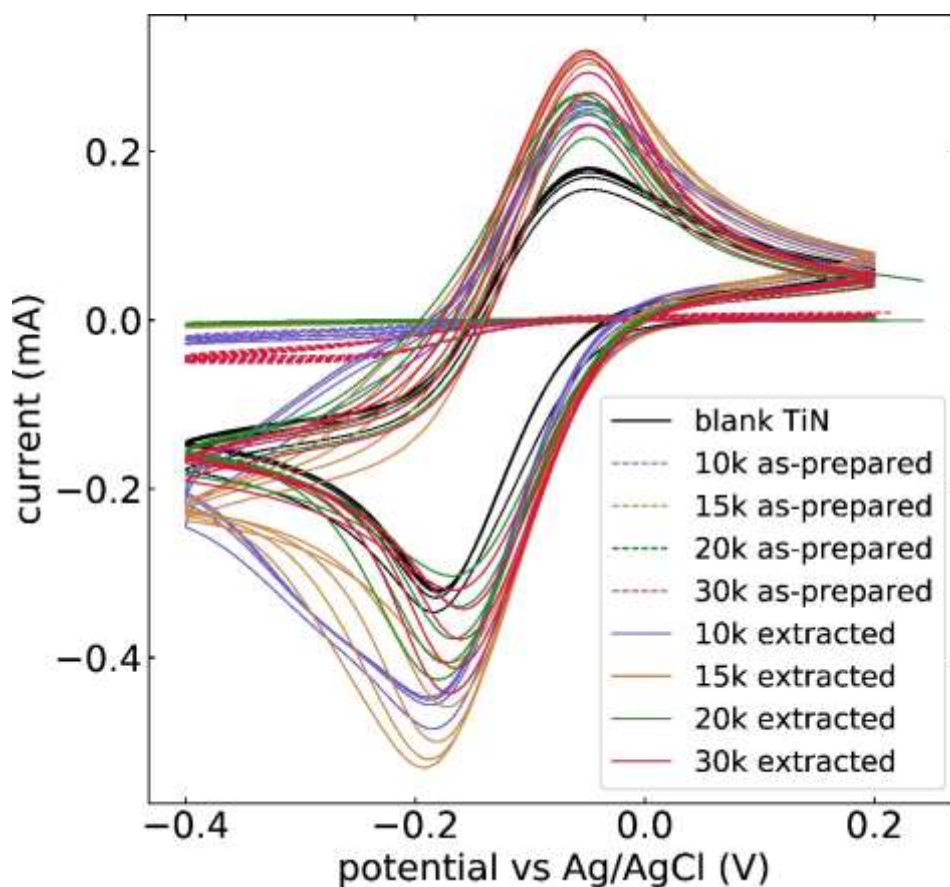

Figure S9: Cyclic voltammetry of mesoporous silica films prepared at 100 Hz on TiN in 5 mM  $[Ru(NH_3)_6]Cl_3$  with 0.1M  $NaNO_3$  between -0.4 V and 0.2 V vs Ag/AgCl at a scan rate of 20 mV/s, five cycles each. Solid black line shows response of a blank TiN substrate with an electrode area of 5 mm x 15 mm. Coloured dashed lines show the current response before, solid ones after, surfactant removal.

1 M. D. Abràmoff, P. J. Magalhães and S. J. Ram, *Biophotonics Int.*, 2004, **11**, 36–41.
